# Supplementary material for: COVID-19 Pandemic: Did Strict Mobility Restrictions Save Lives and Healthcare Costs in Maharashtra, India?
Source: MDPI journal article supplement (doi:10.3390/healthcare11142112), 2023-07-24

# COVID-19 Pandemic: Did harsh mobility restrictions save lives and cost in Maharashtra, India?

## Annexure-D

### Sensitivity Analysis input parameters and Tornado Diagram

| Value Type | Parameter                                         | Total Cost Difference<br>USD (million) |
|------------|---------------------------------------------------|----------------------------------------|
|            | Days Spent in ICU (days)                          |                                        |
| Low        | 4                                                 | 2586.50                                |
| Base Value | 7                                                 | 2596.40                                |
| High       | 19                                                | 2636.02                                |
|            | Days spent in non-ICU for ICU patients (days)     |                                        |
| Low        | 3                                                 | 2586.12                                |
| Base Value | 7                                                 | 2596.40                                |
| High       | 10                                                | 2604.12                                |
|            | Days spent in non-ICU for non-ICU patients (days) |                                        |
| Low        | 4                                                 | 2403.52                                |
| Base Value | 14                                                | 2596.40                                |
| High       | 21                                                | 2731.42                                |
|            | Days for quarantine for contacts (days)           |                                        |
| Low        | 7                                                 | 1790.85                                |
| Base Value | 14                                                | 2596.40                                |
| High       | 21                                                | 3401.96                                |
|            | ICU Bed charges (INR)                             |                                        |
| Low        | 7500                                              | 2595.00                                |
| Base Value | 8825                                              | 2596.40                                |
| High       | 9000                                              | 2596.59                                |
|            | Cost of PPE kit (INR)                             |                                        |
| Low        | 500                                               | 2528.94                                |
| Base Value | 750                                               | 2596.40                                |
| High       | 1000                                              | 2663.87                                |

COVID-19 Pandemic: Did harsh mobility restrictions save lives and cost in Maharashtra, India?

Tornado diagram depicting net change in total cost difference (in million USD) from the base estimate of 2596.40 million USD

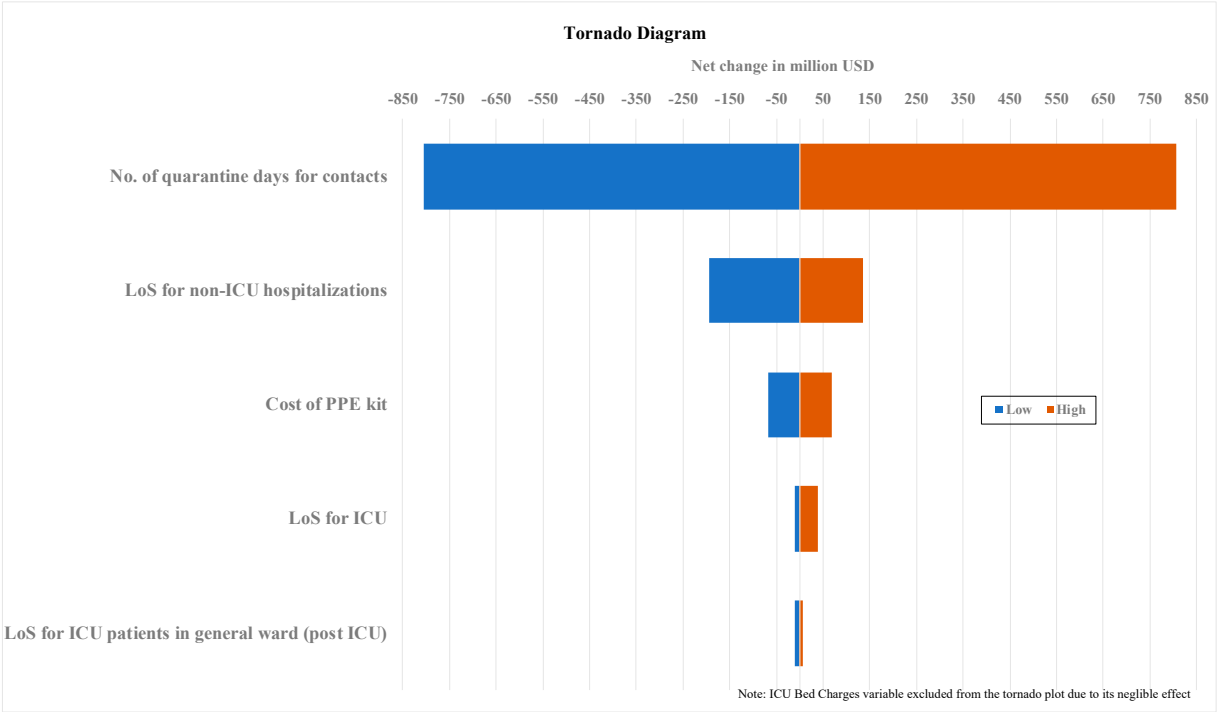

Supplement: s1 [file s1]
