# Supplementary material for: COVID-19 Pandemic: Did Strict Mobility Restrictions Save Lives and Healthcare Costs in Maharashtra, India?
Source: MDPI journal article supplement (doi:10.3390/healthcare11142112), 2023-07-24

## COVID-19 Pandemic: Did harsh mobility restrictions save lives and cost in Maharashtra, India?

### Annexure-E

#### First 37 Day Projection of incident cases in Maharashtra

[projection based on observed case counts  
from 09 March 2020 to 14 April 2020]

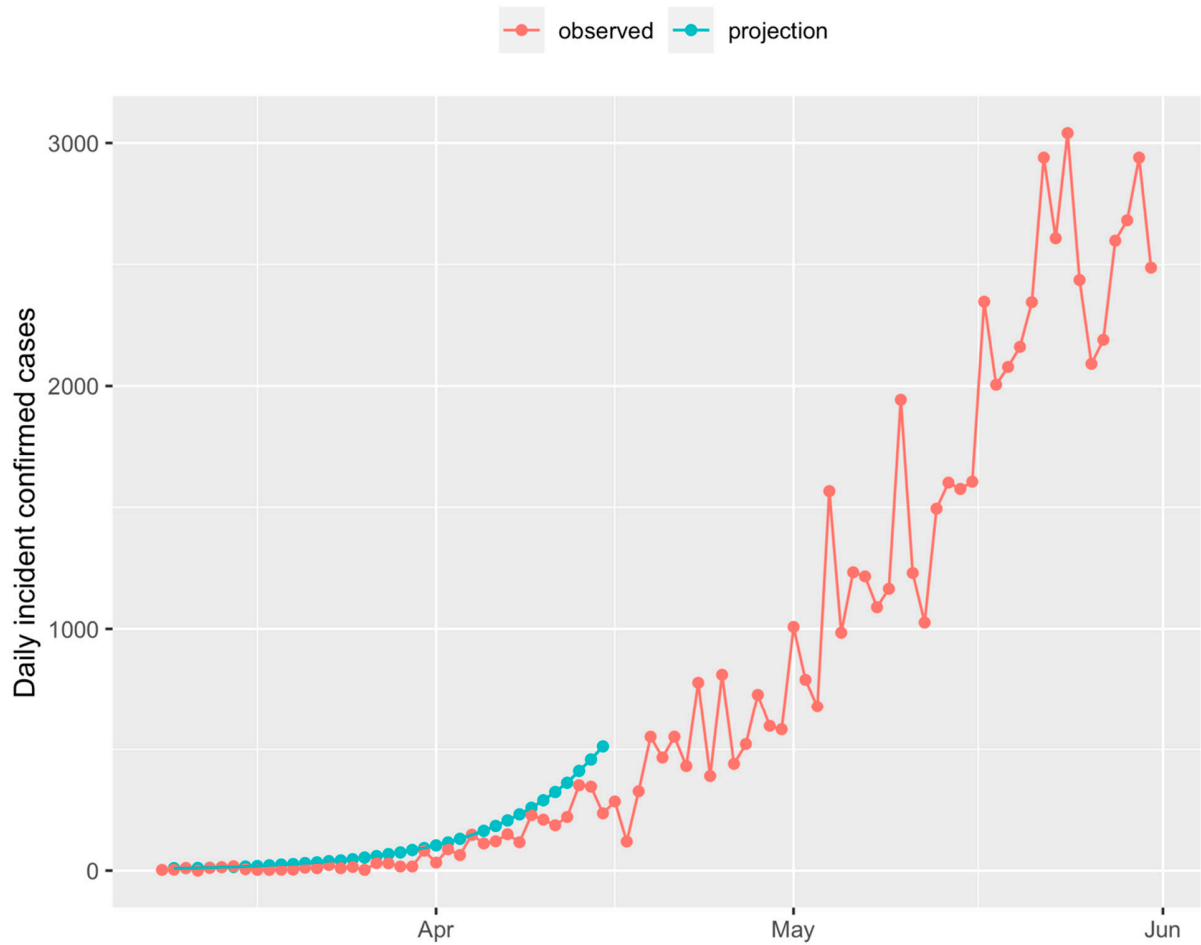

Supplement: s1 [file s1]
