# Supplementary material for: COVID-19 Pandemic: Did Strict Mobility Restrictions Save Lives and Healthcare Costs in Maharashtra, India?
Source: MDPI journal article supplement (doi:10.3390/healthcare11142112), 2023-07-24
Supplement: s1 [file s1]

**COVID-19 Pandemic: Did harsh mobility restrictions save lives and cost in Maharashtra, India? Annexure-C**

**A. Fixed Cost Calculations**

|                                              |           | 1000<br>0000      |                                                                                                                               |                                                                                                                                                                                                                                                                                                                                                                                         |
|----------------------------------------------|-----------|-------------------|-------------------------------------------------------------------------------------------------------------------------------|-----------------------------------------------------------------------------------------------------------------------------------------------------------------------------------------------------------------------------------------------------------------------------------------------------------------------------------------------------------------------------------------|
| Total Allocation for COVID-19 in Maharashtra | In Cr.    | Actual            | Notes                                                                                                                         | Source                                                                                                                                                                                                                                                                                                                                                                                  |
|                                              |           |                   |                                                                                                                               |                                                                                                                                                                                                                                                                                                                                                                                         |
| Initial Allocation                           | 45 Cr.    | 4500<br>0000<br>0 | As per media reports this is the initial allocation by state government to tackle COVID-19                                    | <a href="https://www.livemint.com/news/india/coronavirus-update-maharashtra-allocates-rs-45-crore-to-fight-covid-19-as-cases-rise-to-39-11584368200723.html">https://www.livemint.com/news/india/coronavirus-update-maharashtra-allocates-rs-45-crore-to-fight-covid-19-as-cases-rise-to-39-11584368200723.html</a>                                                                     |
| Share of CMRF                                | 23.82 Cr. | 2382<br>0000<br>0 | As per media reports state received 342 Cr. in CM Relief Fund for COVID-19 of which 23.82 was spent on COVID-19 related items | <a href="https://www.firstpost.com/health/maharashtra-cm-fund-receives-rs-342-cr-in-donations-till-mid-may-rs-23-cr-spent-on-covid-19-rs-55-cr-on-migrant-fare-reveals-rti-query-8437151.html">https://www.firstpost.com/health/maharashtra-cm-fund-receives-rs-342-cr-in-donations-till-mid-may-rs-23-cr-spent-on-covid-19-rs-55-cr-on-migrant-fare-reveals-rti-query-8437151.html</a> |

## COVID-19 Pandemic: Did harsh mobility restrictions save lives and cost in Maharashtra, India?

### Annexure-D

|                                                                                                                      |                 |                      |                                                                                                                                                                                                                                                                                                                                                     |                                                                                                                                                                                                                                                                                                                                         |
|----------------------------------------------------------------------------------------------------------------------|-----------------|----------------------|-----------------------------------------------------------------------------------------------------------------------------------------------------------------------------------------------------------------------------------------------------------------------------------------------------------------------------------------------------|-----------------------------------------------------------------------------------------------------------------------------------------------------------------------------------------------------------------------------------------------------------------------------------------------------------------------------------------|
| %35 share of SDRMF first installment which is allowed to spend on COVID-19 related expenditure                       | 35% of 2148 Cr. | 7518 0000 00         | 35% of total first installment which was allowed to be spent on COVID-19 (25% on Measures for quarantine, sample collection and screening+10% on procurement of essential equipments/labs for response to COVID-19) this restrictions was later removed by the letter on 14 July 2020.and inter-category expenditure was allowed capping it to 35%. | <a href="https://economictimes.indiatimes.com/news/politics-and-nation/states-get-to-use-35-of-disaster-response-fund-for-covid-now/articleshow/77055801.cms?from=mdr">https://economictimes.indiatimes.com/news/politics-and-nation/states-get-to-use-35-of-disaster-response-fund-for-covid-now/articleshow/77055801.cms?from=mdr</a> |
| India COVID-19 Emergency Response and Health System Preparedness Package for Maharashtra (Until 10th September 2020) | 726.38 Cr.      | 7263 8256 15         |                                                                                                                                                                                                                                                                                                                                                     |                                                                                                                                                                                                                                                                                                                                         |
| <b>Total</b>                                                                                                         |                 | <b>1547 0025 615</b> | <b>1547.002562</b>                                                                                                                                                                                                                                                                                                                                  | <b>Cr.</b>                                                                                                                                                                                                                                                                                                                              |

**COVID-19 Pandemic: Did harsh mobility restrictions save lives and cost in Maharashtra, India?**  
**Annexure-D**

**B. SDRMF Calculations**

In SDRMF, Center:State share is 75:25. Center released 1611 Cr. which is the first installment of its total share of 3222 Cr. For state share I have assumed Maharashtra has matched its 25% share to this first installment thus contributing 537 Cr. to SDRMF. The total first installment available under SDRMF becomes 2148 Cr. of which 35% i.e. 751.8 Cr. was allowed to be spent on COVID-19 related activities. This cap was later revised removing intra-category expenditure cap and allowing total expenditure up to 35% from the SDRMF letter issued on 14th July 2020. See the following table for calculation.

|                        |                    |                    |                                |                               |                               |                                                                                                                                                                                                                                                                                                                                                     |                                                                        |                                                                                                          |
|------------------------|--------------------|--------------------|--------------------------------|-------------------------------|-------------------------------|-----------------------------------------------------------------------------------------------------------------------------------------------------------------------------------------------------------------------------------------------------------------------------------------------------------------------------------------------------|------------------------------------------------------------------------|----------------------------------------------------------------------------------------------------------|
|                        |                    |                    |                                |                               |                               | 35% of total first installment which was allowed to be spent on COVID-19 (25% on Measures for quarantine, sample collection and screening+10% on procurement of essential equipments/labs for response to COVID-19) this restrictions was later removed by the letter on 14 July 2020.and inter-category expenditure was allowed capping it to 35%. |                                                                        |                                                                                                          |
| total allocation (Cr.) | Center Share (Cr.) | State share. (Cr.) | first installment center (Cr.) | first installment state (Cr.) | total first installment (Cr.) |                                                                                                                                                                                                                                                                                                                                                     | 10% of total share which was used towards COVID-19 medical expenditure | If we assume state matched central govt's share of first installment funds then 35% of first installment |

**COVID-19 Pandemic: Did harsh mobility restrictions save lives and cost in Maharashtra, India?**

**Annexure-D**

|      |      |      |      |     |      |       |       |              |
|------|------|------|------|-----|------|-------|-------|--------------|
| 4296 | 3222 | 1074 | 1611 | 537 | 2148 | 751.8 | 214.8 | <b>751.8</b> |
|------|------|------|------|-----|------|-------|-------|--------------|

**C. India COVID-19 Emergency Response and  
Health System Preparedness Package for Maharashtra Calculations**

**India COVID-19 Emergency Response and  
Health System Preparedness Package for Maharashtra disbursed as of 10th September 2020 (answer to unstarred question)**

| Items | Cost | Notes | Sources |
|-------|------|-------|---------|
|-------|------|-------|---------|

**COVID-19 Pandemic: Did harsh mobility restrictions save lives and cost in Maharashtra, India?**  
**Annexure-D**

|                                                              |               |                                                                                                                        |                                                                                                                                                                                                                                                                                                                                                       |
|--------------------------------------------------------------|---------------|------------------------------------------------------------------------------------------------------------------------|-------------------------------------------------------------------------------------------------------------------------------------------------------------------------------------------------------------------------------------------------------------------------------------------------------------------------------------------------------|
| CFX-96 Touch Real Time PCR Detection System @ Rs.14,86,800/- | 10407600      |                                                                                                                        | 100000                                                                                                                                                                                                                                                                                                                                                |
| CFX96-IVD Real-Time PCR System @Rs.15,22,500/-               | 7612500       |                                                                                                                        |                                                                                                                                                                                                                                                                                                                                                       |
| Automated RNA Extraction @Rs.42,18,500/-                     | 42185000      |                                                                                                                        |                                                                                                                                                                                                                                                                                                                                                       |
| COBAS 6800 @Rs.3,88,50,000/-                                 | 38850000      |                                                                                                                        |                                                                                                                                                                                                                                                                                                                                                       |
| RNA kit                                                      | 11323807<br>2 |                                                                                                                        |                                                                                                                                                                                                                                                                                                                                                       |
| VTM kit                                                      | 78776585      |                                                                                                                        |                                                                                                                                                                                                                                                                                                                                                       |
| RT-PCR kit                                                   | 72180385<br>8 |                                                                                                                        |                                                                                                                                                                                                                                                                                                                                                       |
| N95 Maskes (distributed 29.26 lakh)                          | 12289200<br>0 | The price of N-95 procurement ranged between 42 to 63 Rs. Between March and May. We considered lowest price of 42 INR. | <a href="https://economictimes.indiatimes.com/industry/healthcare/biotech/healthcare/n95-mask-prices-rise-250-in-4-months-but-no-cap-yet/articleshow/76295506.cms">https://economictimes.indiatimes.com/industry/healthcare/biotech/healthcare/n95-mask-prices-rise-250-in-4-months-but-no-cap-yet/articleshow/76295506.cms</a>                       |
| PPEKit(distributted 12.58 lakh)                              | 94350000<br>0 | considred 750 Rs. is cost Per kit. Range is (750-1000)                                                                 | The costs of hospitalisation for COVID-19.<br><a href="https://economictimes.indiatimes.com/industry/healthcare/biotech/heal...e-costs-of-hospitalisation-for-covid-19/count/slideshow/75313849.cms">https://economictimes.indiatimes.com/industry/healthcare/biotech/heal...e-costs-of-hospitalisation-for-covid-19/count/slideshow/75313849.cms</a> |

**COVID-19 Pandemic: Did harsh mobility restrictions save lives and cost in Maharashtra, India?**  
**Annexure-D**

|                                             |                 |                                                                                                                                                                                                                          |                                                                                                                                                                                                                                                                           |
|---------------------------------------------|-----------------|--------------------------------------------------------------------------------------------------------------------------------------------------------------------------------------------------------------------------|---------------------------------------------------------------------------------------------------------------------------------------------------------------------------------------------------------------------------------------------------------------------------|
| HCQ tablets(distributed 97.2 lakh)          | 29160000        | Govt. procured tablets from Zydus Cadilla and Ipca Lab of which Zydus Cadilla's price was available in media therefore their prices are considered which is Rs.3/tablet                                                  | <a href="https://theprint.in/health/govt-places-order-for-10-crore-hydroxychloroquine-tablets-with-ipca-labs-and-zydus-cadilla/395248/">https://theprint.in/health/govt-places-order-for-10-crore-hydroxychloroquine-tablets-with-ipca-labs-and-zydus-cadilla/395248/</a> |
| installed ventilators (3043)                | 12172000<br>00  | cost of one ventilator is calculated based on PM CARES FUND allocation for ventilators. GOI allocated 2000 Cr. INR for supply of 50000 ventilators. Thus cost of each ventilator = 4,00,000 INR. See calculations below. | <a href="https://pib.gov.in/PressReleaseDetail.aspx?PMO=3&amp;PRID=1633516">https://pib.gov.in/PressReleaseDetail.aspx?PMO=3&amp;PRID=1633516</a>                                                                                                                         |
| <b>Total Grant through Medical supplies</b> | 33256256<br>15  |                                                                                                                                                                                                                          |                                                                                                                                                                                                                                                                           |
|                                             | 332.5625<br>615 | Cr.                                                                                                                                                                                                                      |                                                                                                                                                                                                                                                                           |
| <b>Grant-in-aid</b>                         | <b>393.82</b>   | Cr.                                                                                                                                                                                                                      |                                                                                                                                                                                                                                                                           |
| <b>Total</b>                                | <b>726.38</b>   | Cr.                                                                                                                                                                                                                      |                                                                                                                                                                                                                                                                           |
