# Supplementary material for: COVID-19 Pandemic: Did Strict Mobility Restrictions Save Lives and Healthcare Costs in Maharashtra, India?
Source: MDPI journal article supplement (doi:10.3390/healthcare11142112), 2023-07-24
Supplement: s1 [file s1]

**Annexure-B**  
**Actual and Projected Cases**

| <b>Date</b> | <b>Daily Cases*</b> | <b>No. of actual quarantined contacts@1:20 ratio</b> | <b>Projected Cases</b> | <b>No. of projected quarantined contacts@1:20 ratio</b> |
|-------------|---------------------|------------------------------------------------------|------------------------|---------------------------------------------------------|
| 15-Apr-20   | 236                 | 4720                                                 | 371                    | 7420                                                    |
| 16-Apr-20   | 285                 | 5700                                                 | 418                    | 8360                                                    |
| 17-Apr-20   | 120                 | 2400                                                 | 469                    | 9380                                                    |
| 18-Apr-20   | 327                 | 6540                                                 | 526                    | 10520                                                   |
| 19-Apr-20   | 552                 | 11040                                                | 589                    | 11780                                                   |
| 20-Apr-20   | 466                 | 9320                                                 | 659                    | 13180                                                   |
| 21-Apr-20   | 552                 | 11040                                                | 736                    | 14720                                                   |
| 22-Apr-20   | 431                 | 8620                                                 | 824                    | 16480                                                   |
| 23-Apr-20   | 778                 | 15560                                                | 924                    | 18480                                                   |
| 24-Apr-20   | 390                 | 7800                                                 | 1035                   | 20700                                                   |
| 25-Apr-20   | 811                 | 16220                                                | 1158                   | 23160                                                   |
| 26-Apr-20   | 440                 | 8800                                                 | 1295                   | 25900                                                   |
| 27-Apr-20   | 522                 | 10440                                                | 1450                   | 29000                                                   |
| 28-Apr-20   | 728                 | 14560                                                | 1627                   | 32540                                                   |
| 29-Apr-20   | 597                 | 11940                                                | 1820                   | 36400                                                   |
| 30-Apr-20   | 583                 | 11660                                                | 2039                   | 40780                                                   |
| 1-May-20    | 1008                | 20160                                                | 2283                   | 45660                                                   |
| 2-May-20    | 790                 | 15800                                                | 2557                   | 51140                                                   |
| 3-May-20    | 678                 | 13560                                                | 2861                   | 57220                                                   |
| 4-May-20    | 1567                | 31340                                                | 3204                   | 64080                                                   |
| 5-May-20    | 984                 | 19680                                                | 3580                   | 71600                                                   |
| 6-May-20    | 1233                | 24660                                                | 4014                   | 80280                                                   |
| 7-May-20    | 1216                | 24320                                                | 4496                   | 89920                                                   |
| 8-May-20    | 1089                | 21780                                                | 5038                   | 100760                                                  |
| 9-May-20    | 1165                | 23300                                                | 5638                   | 112760                                                  |
| 10-May-20   | 1943                | 38860                                                | 6310                   | 126200                                                  |
| 11-May-20   | 1230                | 24600                                                | 7076                   | 141520                                                  |
| 12-May-20   | 1026                | 20520                                                | 7924                   | 158480                                                  |
| 13-May-20   | 1495                | 29900                                                | 8863                   | 177260                                                  |
| 14-May-20   | 1602                | 32040                                                | 9914                   | 198280                                                  |
| 15-May-20   | 1576                | 31520                                                | 11106                  | 222120                                                  |
| 16-May-20   | 1606                | 32120                                                | 12453                  | 249060                                                  |
| 17-May-20   | 2347                | 46940                                                | 13925                  | 278500                                                  |
| 18-May-20   | 2005                | 40100                                                | 15599                  | 311980                                                  |

## COVID-19 Pandemic: Did harsh mobility restrictions save lives and cost in Maharashtra, India?

|              |              |                |               |                 |
|--------------|--------------|----------------|---------------|-----------------|
| 19-May-20    | 2078         | 41560          | 17458         | 349160          |
| 20-May-20    | 2161         | 43220          | 19573         | 391460          |
| 21-May-20    | 2345         | 46900          | 21908         | 438160          |
| 22-May-20    | 2940         | 58800          | 24556         | 491120          |
| 23-May-20    | 2608         | 52160          | 27484         | 549680          |
| 24-May-20    | 3041         | 60820          | 30789         | 615780          |
| 25-May-20    | 2436         | 48720          | 34417         | 688340          |
| 26-May-20    | 2091         | 41820          | 38589         | 771780          |
| 27-May-20    | 2190         | 43800          | 43179         | 863580          |
| 28-May-20    | 2598         | 51960          | 48398         | 967960          |
| 29-May-20    | 2682         | 53640          | 54182         | 1083640         |
| 30-May-20    | 2940         | 58800          | 60688         | 1213760         |
| 31-May-20    | 2487         | 49740          | 67889         | 1357780         |
| <b>Total</b> | <b>64975</b> | <b>1299500</b> | <b>631891</b> | <b>12637820</b> |

\*Source: [www.covid19.org](http://www.covid19.org) accessed between 30th March 1st June 2020

### Projected vs Actual cases and contacts for period 15 April-31 May 2020

|           |  | <b>Cases</b> | <b>Contacts</b> |
|-----------|--|--------------|-----------------|
| Projected |  | 631891       | 12637820        |
| Actual    |  | 64975        | 1299500         |
