# Supplementary material for: COVID-19 Pandemic: Did Strict Mobility Restrictions Save Lives and Healthcare Costs in Maharashtra, India?
Source: MDPI journal article supplement (doi:10.3390/healthcare11142112), 2023-07-24
Supplement: s1 [file s1]

COVID-19 Pandemic: Did harsh mobility restrictions save lives and cost in Maharashtra, India?

**Annexure-A  
MEDD Data**

**From MEDD 15 April 2020 Data**

| <b>Age group</b> | <b>Midpoint</b> | <b>No. of deaths</b> | <b>F(x)</b> | <b>% of total deaths</b> | <b>% of deaths below 60 yrs.</b> |
|------------------|-----------------|----------------------|-------------|--------------------------|----------------------------------|
| upto 10 yrs      | 5               | 0                    | 0           | 0                        |                                  |
| 11 to 20         | 15              | 0                    | 0           | 0                        |                                  |
| 21 to 30         | 25              | 5                    | 125         | 2.92397661               |                                  |
| 31 to 40         | 35              | 8                    | 280         | 4.67836257               |                                  |
| 41 to 50         | 45              | 26                   | 1170        | 15.2046784               |                                  |
| 51 to 60         | 55              | 52                   | 2860        | 30.4093567               | 53.2163743                       |
| 61 to 70         | 65              | 52                   | 3380        | 30.4093567               | 83.625731                        |
| 71 to 80         | 75              | 22                   | 1650        | 12.8654971               |                                  |
| 81 to 90         | 85              | 5                    | 425         | 2.92397661               |                                  |
| 91 to 100        | 95              | 0                    | 0           | 0                        |                                  |
| 101 to 110       | 105             | 1                    | 105         | 0.58479532               |                                  |
| <b>Total</b>     |                 | <b>171</b>           | <b>9995</b> |                          |                                  |

**84** **84% are premature deaths**

**Estimated Mean  
(yrs.)**

**58** **This is average age of death**
