# Supplementary material for: COVID-19 Pandemic: Did Strict Mobility Restrictions Save Lives and Healthcare Costs in Maharashtra, India?
Source: Healthcare (Basel). 2023 Jul 24;11(14):2112. doi: 10.3390/healthcare11142112 (PMC10379405; doi:10.3390/healthcare11142112)
Supplement: Supplementary file 1 [file healthcare-11-02112-s001.zip]

Archive with 6 entries (6 files):
- Ambade et al_2022_MH_COVID19_Annexure-SF.xlsx
- Ambade et al_2022_MH_COVID19_Annexure_SA.pdf
- Ambade et al_2022_MH_COVID19_Annexure_SB.pdf
- Ambade et al_2022_MH_COVID19_Annexure_SC.pdf
- Ambade et al_2022_MH_COVID19_Annexure_SD.pdf
- Ambade et al_2022_MH_COVID19_Annexure_SE.pdf
