# Supplementary material for: COVID-19 Pandemic: Did Strict Mobility Restrictions Save Lives and Healthcare Costs in Maharashtra, India?
Source: Healthcare (Basel). 2023 Jul 24;11(14):2112. doi: 10.3390/healthcare11142112 (PMC10379405; doi:10.3390/healthcare11142112)
Supplement: Supplementary file 1 [file healthcare-11-02112-s001.zip › Ambade et al_2022_MH_COVID19_Annexure-SF.xlsx]

## Sheet: Sheet1
Appendix-F: ICER calculations for deaths averted
	Projection	Actual
Costs per case (INR)	366655	568764
Total costs for deaths (million INR)	9267.56	1198.95
Incemental deaths	23168
Incremental costs (million INR)	8068.61
ICER (the cost of preventing 1 death case)	348,265.11 INR (4,643.53 USD)
ICER (the cost preventing one QALY) also called ICER per QALY	33,812.15 INR (450.83 USD)
